# Supplementary material
Source: Royal Society of Chemistry journal article supplement (doi:10.1039/d6nr00836d)
Supplement: d6nr00836d1.pdf [file d6nr00836d1.pdf]

## Electronic Supplementary Information

### Aggregation-Induced Emissive Copper(I) Clusters: From Photophysical Mechanisms to Photocatalytic Performance

Ya-Na Yu<sup>a</sup>, Minjian Wu<sup>a</sup>, Linhua Wang<sup>a</sup>, Zihao Jiang<sup>a</sup>, Jing Wang<sup>a</sup>, Fei Xu<sup>a</sup>,

Lin Qin<sup>\*b</sup>, Liao-Yuan Yao<sup>\*a</sup>, Guo-Yu Yang<sup>\*a</sup>

*a. MOE Key Laboratory of Cluster Science, Beijing Key Laboratory of Photoelectric/Electrophotonic Conversion Materials, School of Chemistry and Chemical Engineering, Beijing Institute of Technology, Beijing 102488, P. R. China. E-mail: [lyyao@bit.edu.cn](mailto:lyyao@bit.edu.cn), [ygy@bit.edu.cn](mailto:ygy@bit.edu.cn).*

*b. Key Laboratory of Agro product Quality and Safety, Institute of Vegetables and Flowers, Chinese Academy of Agricultural Sciences, Beijing 100081, China; E-mail: [qinlin01@caas.cn](mailto:qinlin01@caas.cn).*

**Table S1.** Crystal data for **Cu<sub>3</sub>**

|                                             |                                                                               |
|---------------------------------------------|-------------------------------------------------------------------------------|
| Empirical formula                           | C <sub>93</sub> H <sub>74</sub> Cu <sub>3</sub> O <sub>4</sub> P <sub>6</sub> |
| Formula weight                              | 1631.96                                                                       |
| Temperature/K                               | 100.00(10)                                                                    |
| Crystal system                              | hexagonal                                                                     |
| Space group                                 | <i>P</i> 6 <sub>5</sub>                                                       |
| a/Å                                         | 24.2269(6)                                                                    |
| b/Å                                         | 24.2269(6)                                                                    |
| c/Å                                         | 28.2438(7)                                                                    |
| $\alpha$ /°                                 | 90                                                                            |
| $\beta$ /°                                  | 90                                                                            |
| $\gamma$ /°                                 | 120                                                                           |
| Volume/Å <sup>3</sup>                       | 14356.5(8)                                                                    |
| Z                                           | 6                                                                             |
| $\rho_{\text{calc}}/\text{cm}^3$            | 1.133                                                                         |
| $\mu/\text{mm}^{-1}$                        | 0.804                                                                         |
| F(000)                                      | 5046.0                                                                        |
| Radiation                                   | Mo K $\alpha$ ( $\lambda$ = 0.71073)                                          |
| 2 $\Theta$ range for data collection/°      | 4.43 to 61.918                                                                |
| Index ranges                                | -26 $\leq$ h $\leq$ 33, -34 $\leq$ k $\leq$ 19, -28 $\leq$ l $\leq$ 39        |
| Reflections collected                       | 73567                                                                         |
| Independent reflections                     | 22507 [ $R_{\text{int}}$ = 0.0845, $R_{\text{sigma}}$ = 0.1171]               |
| Data/restraints/parameters                  | 22507/698/878                                                                 |
| Goodness-of-fit on F <sup>2</sup>           | 1.042                                                                         |
| Final R indexes [ $I \geq 2\sigma(I)$ ]     | $R_1$ = 0.0908, $wR_2$ = 0.2427                                               |
| Final R indexes [all data]                  | $R_1$ = 0.1324, $wR_2$ = 0.2715                                               |
| Largest diff. peak/hole / e Å <sup>-3</sup> | 1.36/-1.08                                                                    |
| Flack parameter                             | -0.01(2)                                                                      |

**Table S2. Bond Lengths for Cu<sub>3</sub>**

|           |            |           |           |
|-----------|------------|-----------|-----------|
| Cu01-Cu02 | 2.5825(14) | C18-C020  | 1.3900    |
| Cu01-Cu03 | 2.5761(14) | C020-C02E | 1.422(15) |
| Cu01-P004 | 2.280(2)   | C00V-C011 | 1.385(17) |
| Cu01-P005 | 2.289(2)   | C00X-C01D | 1.400(15) |
| Cu01-C00A | 2.098(9)   | C00X-C01W | 1.362(16) |
| Cu01-C017 | 2.197(10)  | C00Z-C018 | 1.377(14) |
| Cu02-Cu03 | 2.5875(19) | C010-C01B | 1.401(19) |
| Cu02-P006 | 2.272(2)   | C010-C01O | 1.43(2)   |
| Cu02-P007 | 2.279(3)   | C012-C016 | 1.371(15) |
| Cu02-C00A | 2.248(10)  | C014-C01A | 1.34(2)   |
| Cu02-C017 | 2.127(10)  | C014-C01W | 1.34(2)   |
| Cu03-P008 | 2.263(3)   | C015-C016 | 1.362(17) |
| Cu03-P009 | 2.273(3)   | C015-C01U | 1.37(2)   |
| Cu03-C00A | 2.102(9)   | C017-C02E | 1.197(17) |
| Cu03-C017 | 2.219(15)  | C01B-C01Q | 1.431(17) |
| P004-C00C | 1.841(10)  | C01C-C01K | 1.40(2)   |
| P004-C00L | 1.817(8)   | C01F-C01H | 1.42(3)   |
| P004-C00S | 1.849(9)   | C01F-C01M | 1.34(2)   |
| P005-C00E | 1.827(11)  | C01G-C01M | 1.451(17) |
| P005-C00J | 1.824(9)   | C01G-C01V | 1.27(3)   |
| P005-C00Q | 1.850(8)   | C01H-C026 | 1.38(2)   |
| P006-C00M | 1.831(10)  | C01I-C01Z | 1.376(19) |
| P006-C019 | 1.814(12)  | C01K-C01Z | 1.41(2)   |
| P006-C01L | 1.842(7)   | C01O-C02A | 1.33(2)   |
| P007-C00S | 1.833(8)   | C01Q-C023 | 1.28(2)   |
| P007-C010 | 1.829(11)  | C01U-C01X | 1.43(2)   |
| P007-C012 | 1.795(12)  | C01V-C026 | 1.38(3)   |
| P008-C00Q | 1.818(10)  | C022-C021 | 1.3900    |
| P008-C01M | 1.827(18)  | C022-C025 | 1.3900    |
| P008-C01R | 1.755(7)   | C021-C02H | 1.3900    |
| P009-C019 | 1.843(8)   | C02H-C02K | 1.3900    |
| P009-C021 | 1.767(8)   | C02K-C027 | 1.3900    |
| P009-C01T | 2.059(9)   | C027-C025 | 1.3900    |
| C00A-C00K | 1.211(14)  | C023-C02A | 1.53(3)   |
| C00B-C00E | 1.428(14)  | C024-C013 | 1.3900    |
| C00B-C011 | 1.379(17)  | C024-C8   | 1.3900    |
| C00C-C00P | 1.353(15)  | C013-C01L | 1.3900    |
| C00C-C01I | 1.375(13)  | C01L-C13  | 1.3900    |
| C00D-C00F | 1.359(13)  | C13-C11   | 1.3900    |
| C00D-C00J | 1.409(13)  | C11-C8    | 1.3900    |
| C00E-C00G | 1.392(13)  | C028-C01J | 1.3900    |
| C00F-C00I | 1.361(15)  | C028-C01N | 1.3900    |
| C00G-C00H | 1.366(16)  | C01J-C02G | 1.3900    |

|           |           |           |         |
|-----------|-----------|-----------|---------|
| C00H-C00V | 1.412(16) | C02G-C02C | 1.3900  |
| C00I-C018 | 1.375(14) | C02C-C01R | 1.3900  |
| C00J-C00Z | 1.370(15) | C01R-C01N | 1.3900  |
| C00K-C01E | 1.434(13) | C02D-C01P | 1.3900  |
| C00L-C00R | 1.402(14) | C02D-C1   | 1.3900  |
| C00L-C00T | 1.385(13) | C01P-C02M | 1.3900  |
| C00M-C01A | 1.404(14) | C02M-C01T | 1.3900  |
| C00M-C01D | 1.374(15) | C01T-C02B | 1.3900  |
| C00N-C012 | 1.403(17) | C02B-C1   | 1.3900  |
| C00N-C01X | 1.39(2)   | C19-C424  | 1.3900  |
| C00O-C00W | 1.350(16) | C19-C6    | 1.3900  |
| C00O-C00Y | 1.335(18) | C424-C26  | 1.3900  |
| C00P-C01C | 1.387(16) | C424-C2   | 1.52(3) |
| C00R-C00W | 1.402(13) | C26-C01Y  | 1.3900  |
| C00T-C00Y | 1.414(15) | C01Y-C01E | 1.3900  |
| C00U-C01S | 1.3900    | C01E-C6   | 1.3900  |
| C00U-C020 | 1.3900    | O10-C139  | 1.23(2) |
| C01S-C02N | 1.3900    | O14-C139  | 1.22(2) |
| C02N-C20  | 1.3900    | O11-C2    | 1.21(3) |
| C02N-C139 | 1.55(2)   | C2-O50    | 1.21(3) |
| C20-C18   | 1.3900    |           |         |

**Table S3. Bond Angles for Cu<sub>3</sub>**

|                |            |                |           |
|----------------|------------|----------------|-----------|
| Cu03-Cu01-Cu02 | 60.21(4)   | C00Y-C00O-C00W | 120.2(9)  |
| P004-Cu01-Cu02 | 93.55(6)   | C00C-C00P-C01C | 122.4(10) |
| P004-Cu01-Cu03 | 153.68(7)  | P008-C00Q-P005 | 109.8(5)  |
| P005-Cu01-Cu02 | 152.17(7)  | C00W-C00R-C00L | 120.5(9)  |
| P005-Cu01-Cu03 | 93.57(7)   | P007-C00S-P004 | 109.3(4)  |
| P005-Cu01-P004 | 112.64(8)  | C00L-C00T-C00Y | 119.9(10) |
| C00A-Cu01-Cu02 | 56.3(3)    | C01S-C00U-C020 | 120.0     |
| C00A-Cu01-Cu03 | 52.2(2)    | C00U-C01S-C02N | 120.0     |
| C00A-Cu01-P004 | 113.2(2)   | C01S-C02N-C20  | 120.0     |
| C00A-Cu01-P005 | 116.6(2)   | C01S-C02N-C139 | 119.0(16) |
| C00A-Cu01-C017 | 94.0(4)    | C20-C02N-C139  | 121.0(16) |
| C017-Cu01-Cu02 | 52.1(3)    | C02N-C20-C18   | 120.0     |
| C017-Cu01-Cu03 | 54.7(4)    | C020-C18-C20   | 120.0     |
| C017-Cu01-P004 | 112.2(4)   | C00U-C020-C02E | 121.4(9)  |
| C017-Cu01-P005 | 106.5(3)   | C18-C020-C00U  | 120.0     |
| Cu01-Cu02-Cu03 | 59.77(4)   | C18-C020-C02E  | 118.6(8)  |
| P006-Cu02-Cu01 | 150.89(10) | C011-C00V-C00H | 117.6(12) |
| P006-Cu02-Cu03 | 92.77(8)   | C00O-C00W-C00R | 120.5(10) |
| P006-Cu02-P007 | 111.75(10) | C01W-C00X-C01D | 120.9(12) |
| P007-Cu02-Cu01 | 96.45(7)   | C00O-C00Y-C00T | 121.4(10) |
| P007-Cu02-Cu03 | 155.27(7)  | C018-C00Z-C00J | 120.0(9)  |
| C00A-Cu02-Cu01 | 50.9(2)    | C01B-C010-P007 | 121.9(10) |
| C00A-Cu02-Cu03 | 51.0(2)    | C01B-C010-C01O | 121.0(11) |
| C00A-Cu02-P006 | 105.4(2)   | C01O-C010-P007 | 116.4(10) |
| C00A-Cu02-P007 | 120.9(2)   | C00B-C011-C00V | 121.9(10) |
| C017-Cu02-Cu01 | 54.6(3)    | C00N-C012-P007 | 122.7(9)  |
| C017-Cu02-Cu03 | 55.1(4)    | C016-C012-P007 | 120.4(9)  |
| C017-Cu02-P006 | 119.5(3)   | C016-C012-C00N | 116.8(11) |
| C017-Cu02-P007 | 106.9(4)   | C01W-C014-C01A | 121.0(10) |
| C017-Cu02-C00A | 91.8(5)    | C01U-C015-C016 | 120.2(13) |
| Cu01-Cu03-Cu02 | 60.02(4)   | C012-C016-C015 | 123.3(11) |
| P008-Cu03-Cu01 | 97.09(7)   | Cu01-C017-Cu03 | 71.4(4)   |
| P008-Cu03-Cu02 | 153.78(10) | Cu02-C017-Cu01 | 73.3(3)   |
| P008-Cu03-P009 | 108.11(11) | Cu02-C017-Cu03 | 73.0(3)   |
| P009-Cu03-Cu01 | 153.49(9)  | C02E-C017-Cu01 | 140.1(8)  |
| P009-Cu03-Cu02 | 96.77(9)   | C02E-C017-Cu02 | 137.2(13) |
| C00A-Cu03-Cu01 | 52.1(2)    | C02E-C017-Cu03 | 133.0(12) |
| C00A-Cu03-Cu02 | 56.1(3)    | C00Z-C018-C00I | 120.3(10) |
| C00A-Cu03-P008 | 121.7(3)   | P006-C019-P009 | 108.5(5)  |
| C00A-Cu03-P009 | 105.6(2)   | C014-C01A-C00M | 121.6(12) |
| C00A-Cu03-C017 | 93.2(4)    | C010-C01B-C01Q | 121.3(14) |
| C017-Cu03-Cu01 | 53.9(2)    | C00P-C01C-C01K | 116.9(14) |
| C017-Cu03-Cu02 | 51.8(3)    | C00M-C01D-C00X | 119.0(9)  |

|                |          |                |           |
|----------------|----------|----------------|-----------|
| C017-Cu03-P008 | 105.4(3) | C01H-C01F-C01M | 121.1(12) |
| C017-Cu03-P009 | 123.5(3) | C01V-C01G-C01M | 123.5(18) |
| C00C-P004-Cu01 | 116.4(3) | C01F-C01H-C026 | 118.4(18) |
| C00C-P004-C00L | 103.0(4) | C01Z-C01I-C00C | 119.9(13) |
| C00C-P004-C00S | 103.3(4) | C01Z-C01K-C01C | 120.7(12) |
| C00L-P004-Cu01 | 120.8(3) | C01F-C01M-P008 | 119.1(9)  |
| C00L-P004-C00S | 102.5(4) | C01F-C01M-C01G | 116.4(17) |
| C00S-P004-Cu01 | 108.8(3) | C01G-C01M-P008 | 124.5(13) |
| C00E-P005-Cu01 | 115.2(3) | C02A-C01O-C010 | 118.2(17) |
| C00E-P005-C00J | 106.0(4) | C023-C01Q-C01B | 116.7(15) |
| C00E-P005-C00Q | 104.8(5) | C015-C01U-C01X | 119.4(13) |
| C00J-P005-Cu01 | 118.9(3) | C01G-C01V-C026 | 119.9(15) |
| C00J-P005-C00Q | 100.0(4) | C00X-C01W-C014 | 119.7(12) |
| C00Q-P005-Cu01 | 110.2(3) | C00N-C01X-C01U | 118.3(13) |
| C00M-P006-Cu02 | 113.5(3) | C01K-C01Z-C01I | 119.1(12) |
| C00M-P006-C01L | 100.3(5) | C021-C022-C025 | 120.0     |
| C019-P006-Cu02 | 111.8(3) | C022-C021-P009 | 124.0(6)  |
| C019-P006-C00M | 103.3(4) | C022-C021-C02H | 120.0     |
| C019-P006-C01L | 110.5(5) | C02H-C021-P009 | 115.9(6)  |
| C01L-P006-Cu02 | 116.1(3) | C02K-C02H-C021 | 120.0     |
| C00S-P007-Cu02 | 110.2(3) | C02H-C02K-C027 | 120.0     |
| C010-P007-Cu02 | 115.5(5) | C02K-C027-C025 | 120.0     |
| C010-P007-C00S | 100.2(4) | C027-C025-C022 | 120.0     |
| C012-P007-Cu02 | 120.0(4) | C01Q-C023-C02A | 124.2(14) |
| C012-P007-C00S | 103.9(5) | C013-C024-C8   | 120.0     |
| C012-P007-C010 | 104.6(6) | C01L-C013-C024 | 120.0     |
| C00Q-P008-Cu03 | 110.2(4) | C013-C01L-P006 | 121.6(5)  |
| C00Q-P008-C01M | 102.5(5) | C013-C01L-C13  | 120.0     |
| C01M-P008-Cu03 | 121.6(4) | C13-C01L-P006  | 118.3(5)  |
| C01R-P008-Cu03 | 112.3(4) | C11-C13-C01L   | 120.0     |
| C01R-P008-C00Q | 106.9(5) | C8-C11-C13     | 120.0     |
| C01R-P008-C01M | 102.1(5) | C11-C8-C024    | 120.0     |
| C019-P009-Cu03 | 109.5(3) | C01V-C026-C01H | 121(2)    |
| C019-P009-C01T | 98.4(5)  | C01J-C028-C01N | 120.0     |
| C021-P009-Cu03 | 123.0(4) | C02G-C01J-C028 | 120.0     |
| C021-P009-C019 | 104.6(5) | C02C-C02G-C01J | 120.0     |
| C021-P009-C01T | 106.7(5) | C01R-C02C-C02G | 120.0     |
| C01T-P009-Cu03 | 111.7(3) | C02C-C01R-P008 | 115.9(6)  |
| Cu01-C00A-Cu02 | 72.8(3)  | C02C-C01R-C01N | 120.0     |
| Cu03-C00A-Cu01 | 75.7(3)  | C01N-C01R-P008 | 124.0(6)  |
| Cu03-C00A-Cu02 | 72.9(3)  | C01R-C01N-C028 | 120.0     |
| C00K-C00A-Cu01 | 146.8(7) | C01O-C02A-C023 | 118.2(16) |
| C00K-C00A-Cu02 | 128.4(7) | C01P-C02D-C1   | 120.0     |
| C00K-C00A-Cu03 | 131.1(7) | C02D-C01P-C02M | 120.0     |

|                |           |                |           |
|----------------|-----------|----------------|-----------|
| C011-C00B-C00E | 119.5(10) | C01T-C02M-C01P | 120.0     |
| C00P-C00C-P004 | 119.5(7)  | C02M-C01T-P009 | 117.7(4)  |
| C00P-C00C-C01I | 120.7(10) | C02M-C01T-C02B | 120.0     |
| C01I-C00C-P004 | 119.7(9)  | C02B-C01T-P009 | 121.6(4)  |
| C00F-C00D-C00J | 120.9(10) | C1-C02B-C01T   | 120.0     |
| C00B-C00E-P005 | 123.6(7)  | C02B-C1-C02D   | 120.0     |
| C00G-C00E-P005 | 117.5(7)  | C017-C02E-C020 | 170.8(19) |
| C00G-C00E-C00B | 118.8(10) | C424-C19-C6    | 120.0     |
| C00I-C00F-C00D | 119.7(9)  | C19-C424-C26   | 120.0     |
| C00H-C00G-C00E | 120.3(9)  | C19-C424-C2    | 126(2)    |
| C00G-C00H-C00V | 121.9(10) | C26-C424-C2    | 114(2)    |
| C00F-C00I-C018 | 120.4(9)  | C01Y-C26-C424  | 120.0     |
| C00D-C00J-P005 | 124.5(8)  | C01E-C01Y-C26  | 120.0     |
| C00Z-C00J-P005 | 116.9(6)  | C01Y-C01E-C00K | 121.1(7)  |
| C00Z-C00J-C00D | 118.4(8)  | C01Y-C01E-C6   | 120.0     |
| C00A-C00K-C01E | 178.8(11) | C6-C01E-C00K   | 117.8(7)  |
| C00R-C00L-P004 | 123.8(6)  | C01E-C6-C19    | 120.0     |
| C00T-C00L-P004 | 118.8(7)  | O11-C2-C424    | 125(5)    |
| C00T-C00L-C00R | 117.3(8)  | O11-C2-O50     | 127(5)    |
| C01A-C00M-P006 | 119.9(9)  | O50-C2-C424    | 107(4)    |
| C01D-C00M-P006 | 122.0(7)  | O10-C139-C02N  | 114(3)    |
| C01D-C00M-C01A | 117.7(10) | O10-C139-O14   | 126(3)    |
| C01X-C00N-C012 | 121.8(13) | O14-C139-C02N  | 120(3)    |

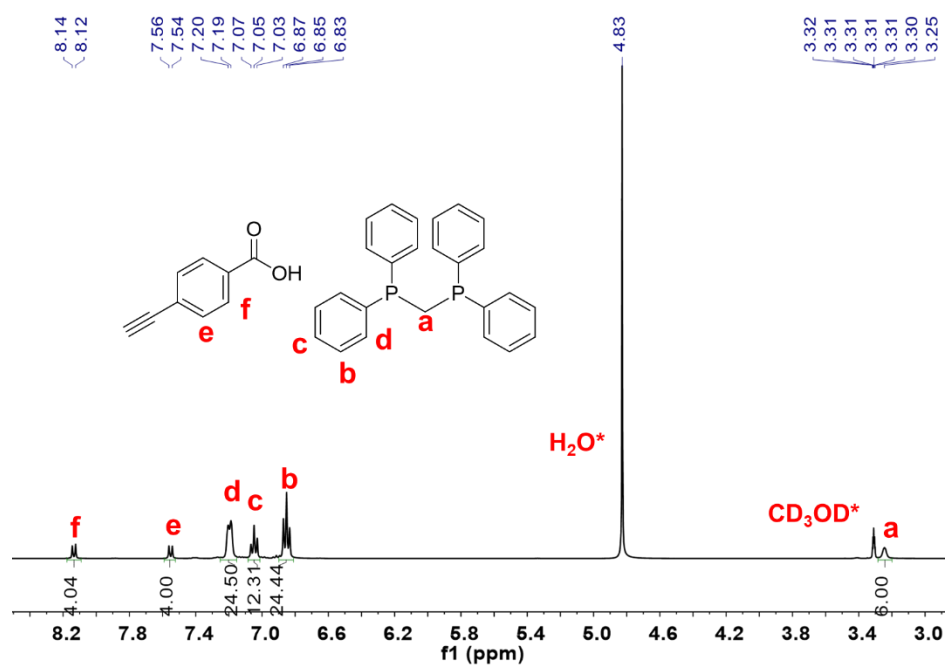

Fig. S1. <sup>1</sup>H NMR spectrum of Cu<sub>3</sub> (400 MHz, CD<sub>3</sub>OD, 298 K).

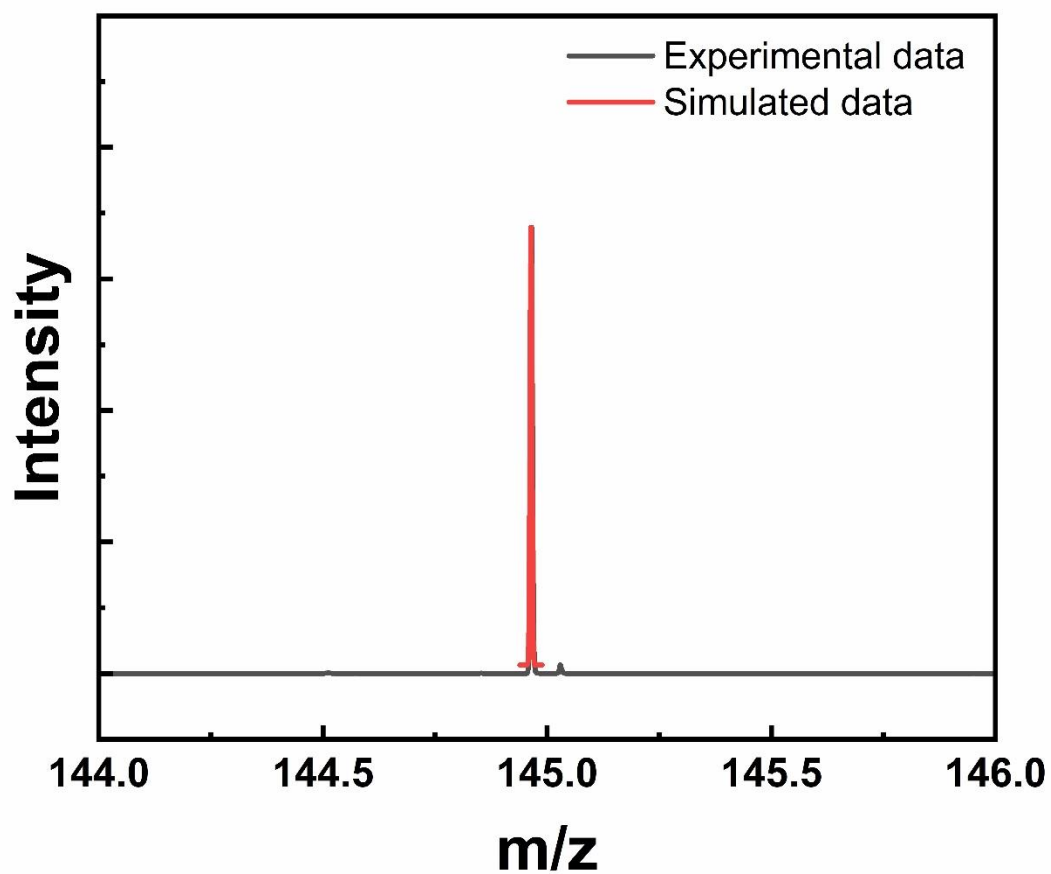

Fig. S2. Negative mode ESI-MS spectrum of Cu<sub>3</sub> in MeOH.

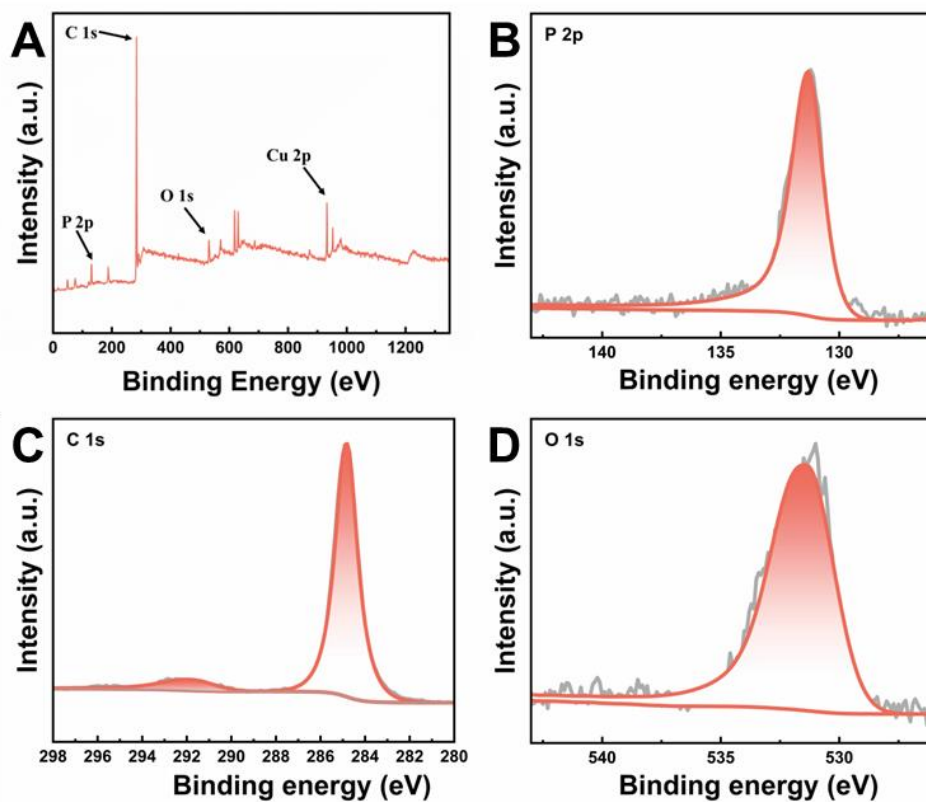

Fig. S3. XPS spectra of  $\text{Cu}_3$  : Full scan(A), P 2p(B), C 1s(C), and O 1s(D).

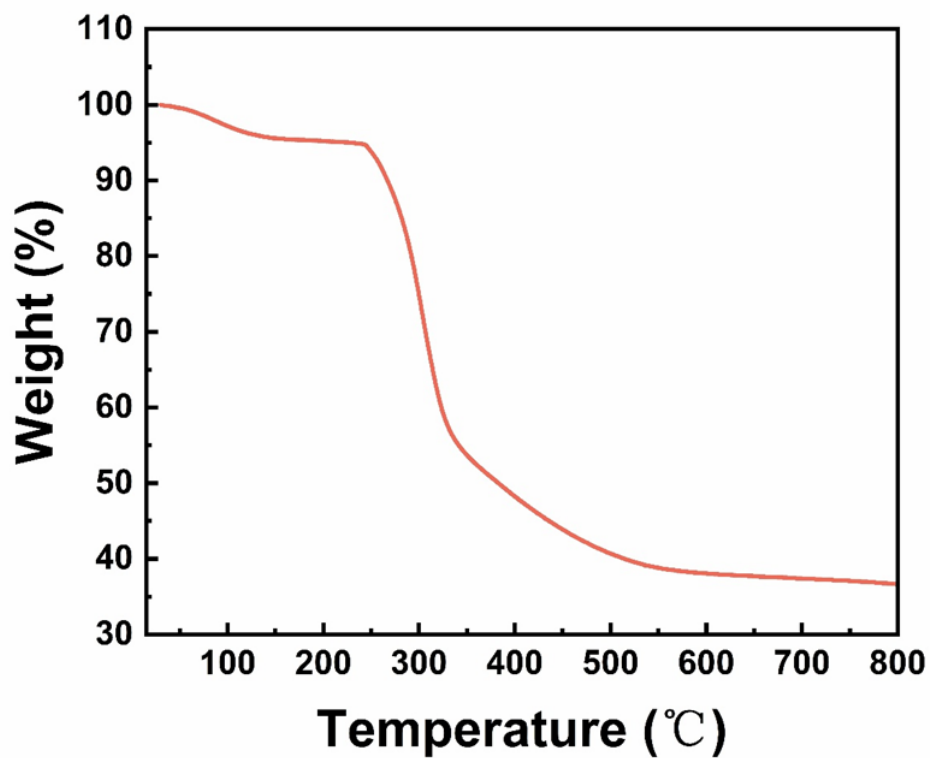

Fig. S4. TGA plot of  $\text{Cu}_3$  nanocluster.

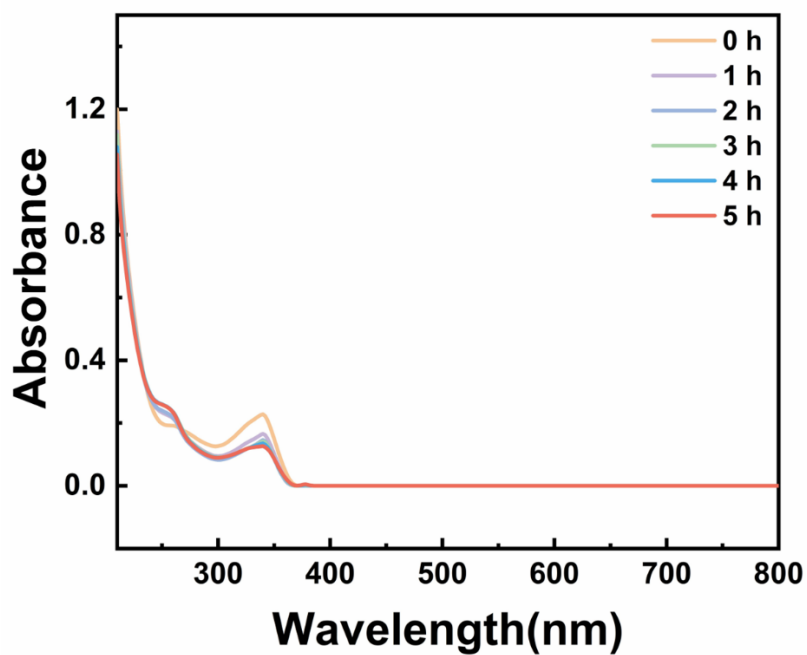

**Fig. S5.** UV monitoring curve of  $\text{Cu}_3$  nanocluster.

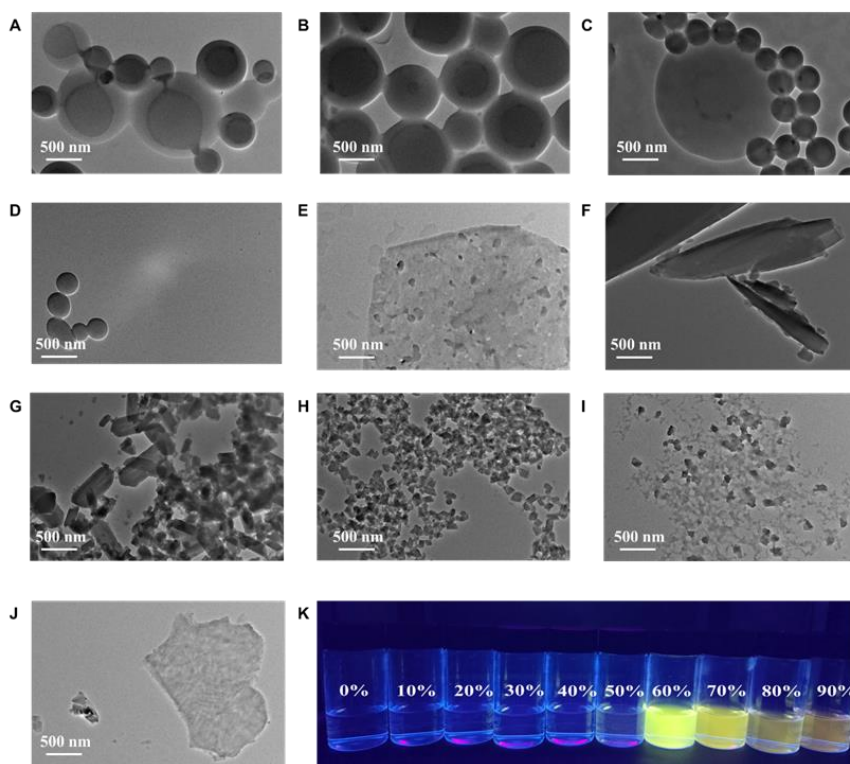

**Fig. S6.** TEM image of  $\text{Cu}_3$  in  $\text{H}_2\text{O}/\text{MeOH}$  mixtures with different  $f_{\text{water}}$  values(500nm). (A):  $f_{\text{water}}=0\%$ ; (B):  $f_{\text{water}}=10\%$ ; (C):  $f_{\text{water}}=20\%$ ; (D):  $f_{\text{water}}=30\%$ ; (E):  $f_{\text{water}}=40\%$ ; (F):  $f_{\text{water}}=50\%$ ; (G):  $f_{\text{water}}=60\%$ ; (H):  $f_{\text{water}}=70\%$ ; (I):  $f_{\text{water}}=80\%$ ; (J):  $f_{\text{water}}=90\%$ ; (K): The higher the volume fraction of  $\text{Cu}_3$  in the solution, the greater the discharge intensity in the photograph.

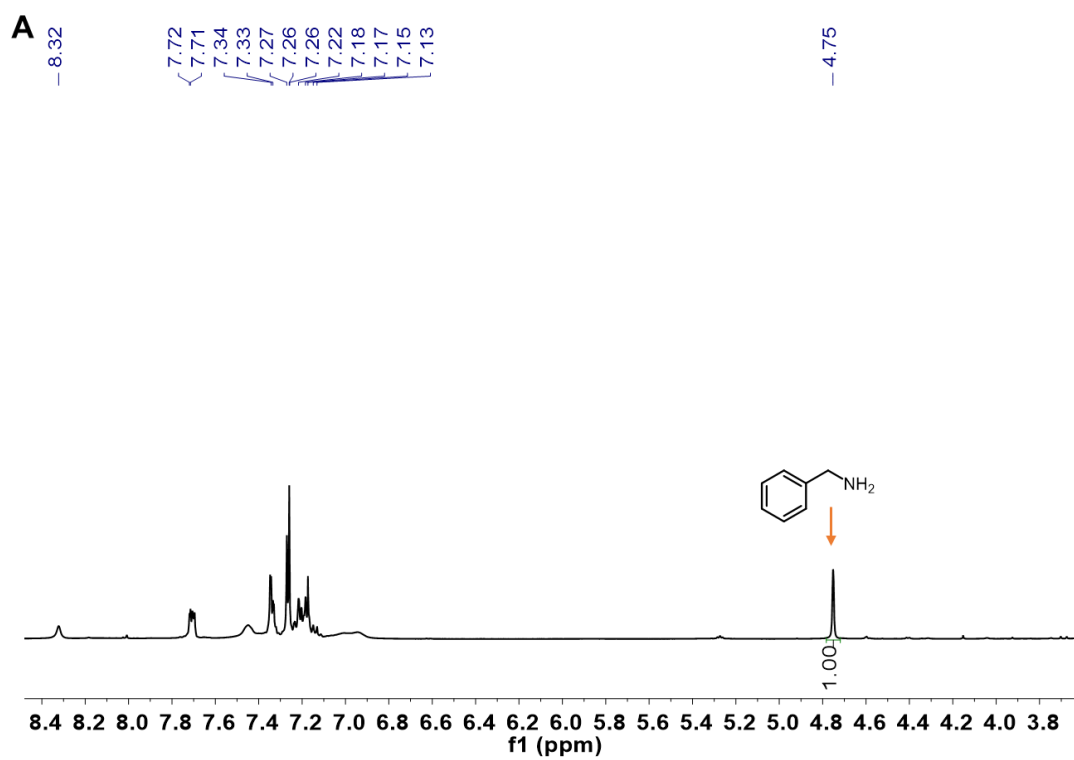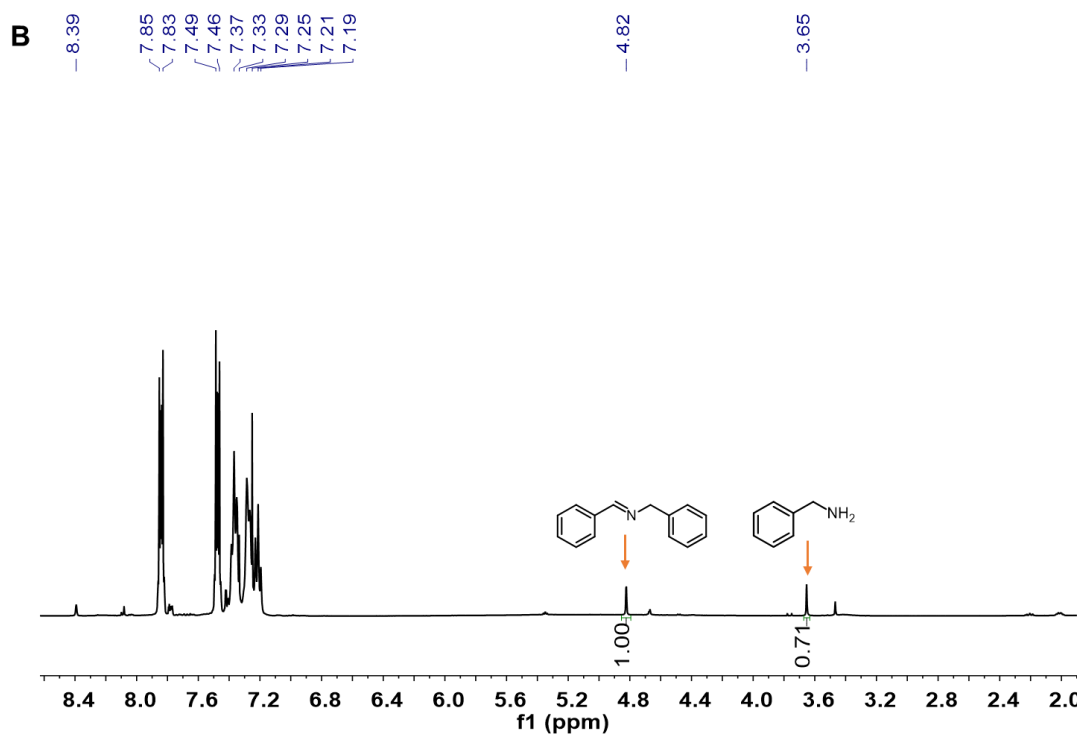

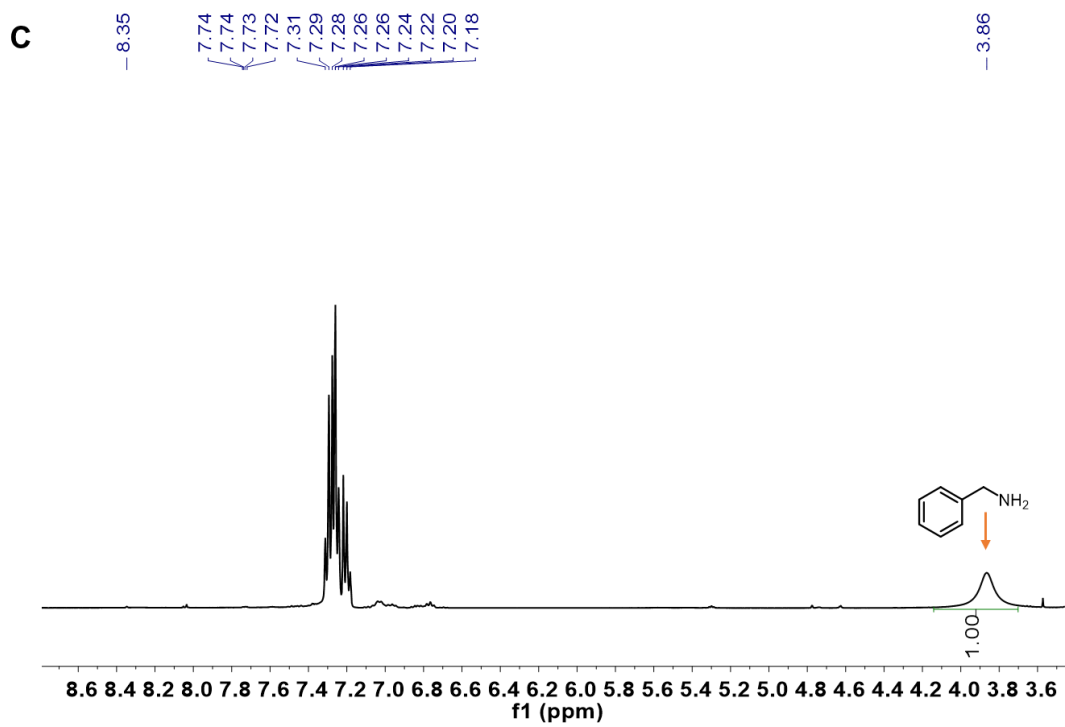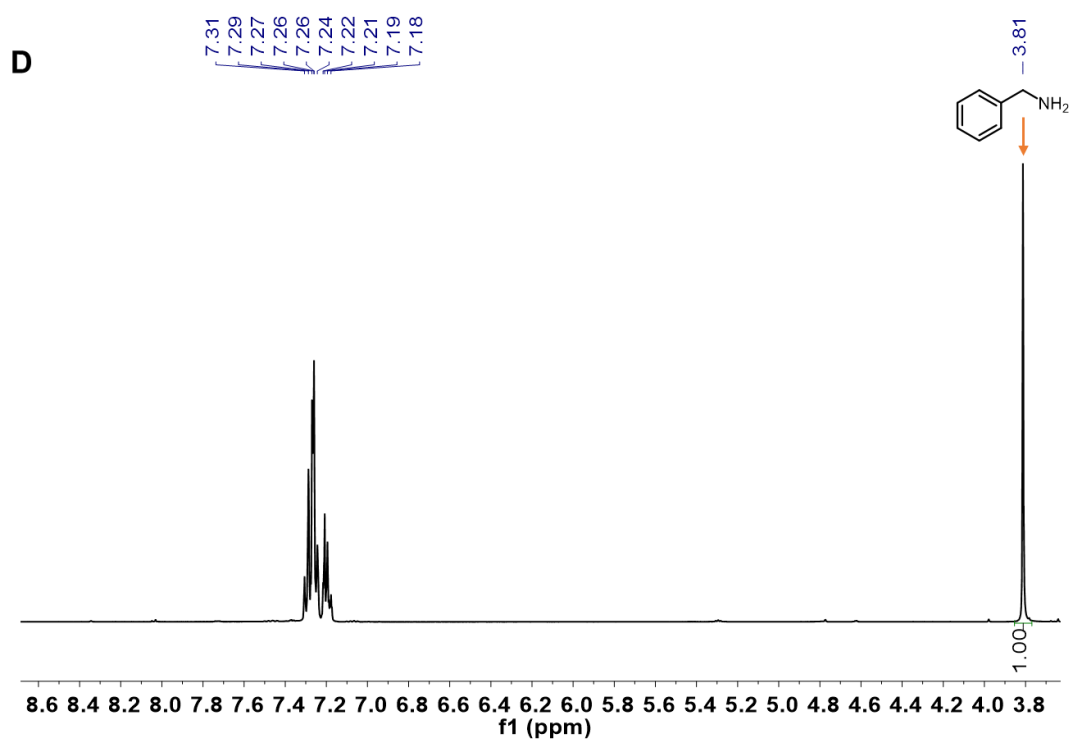

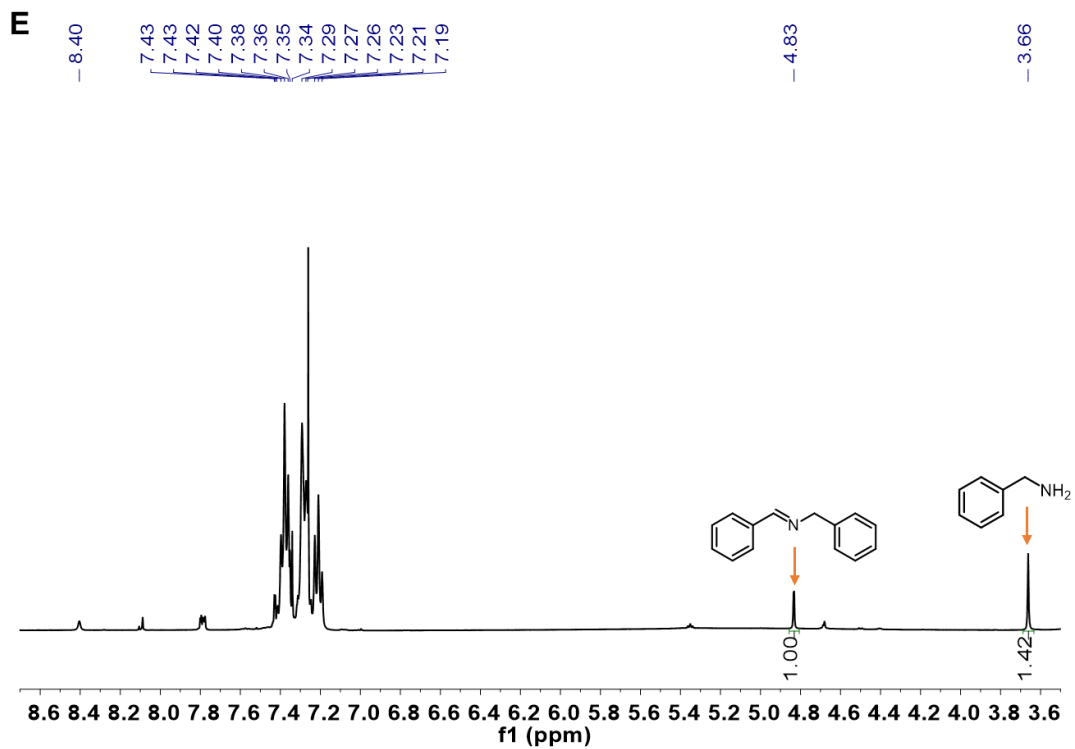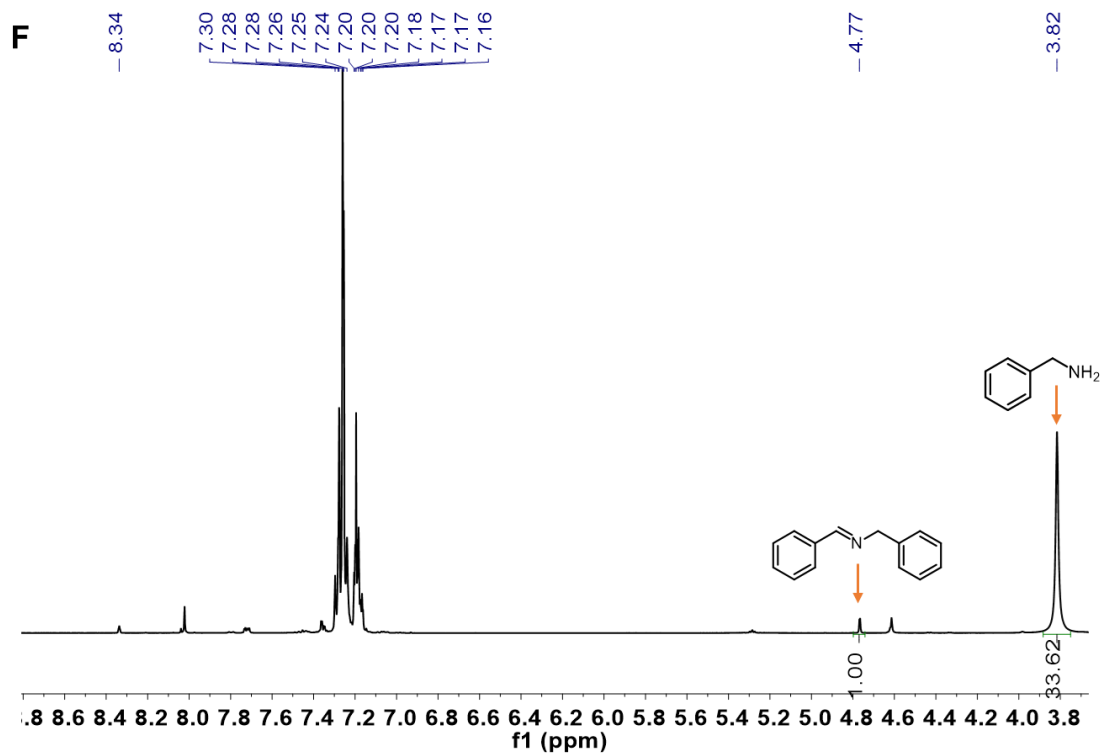

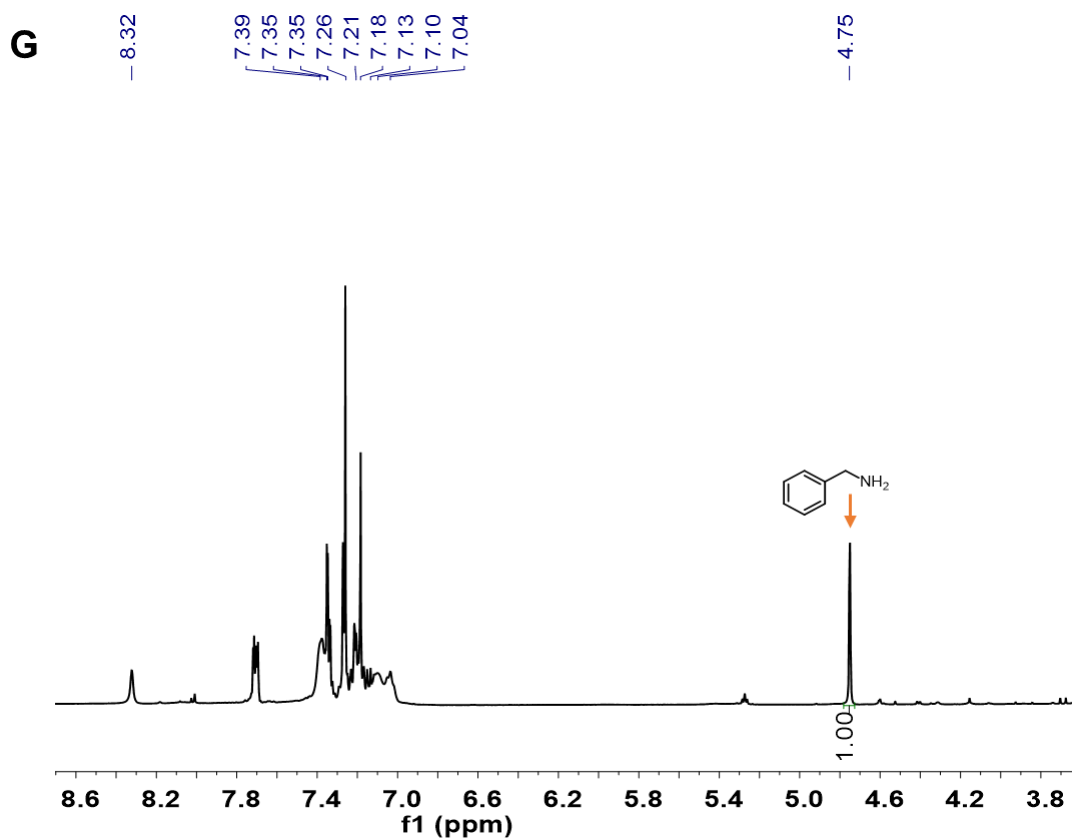

**Fig. S7.**  $^1\text{H}$  NMR signals of benzylamine. (A): Table 1, entry 1; (B): Table 1, entry 2; (C): Table 1, entry 3; (D): Table 1, entry 4; (E): Table 1, entry 5; (F): Table 1, entry 6; (G): Table 1, entry 7.

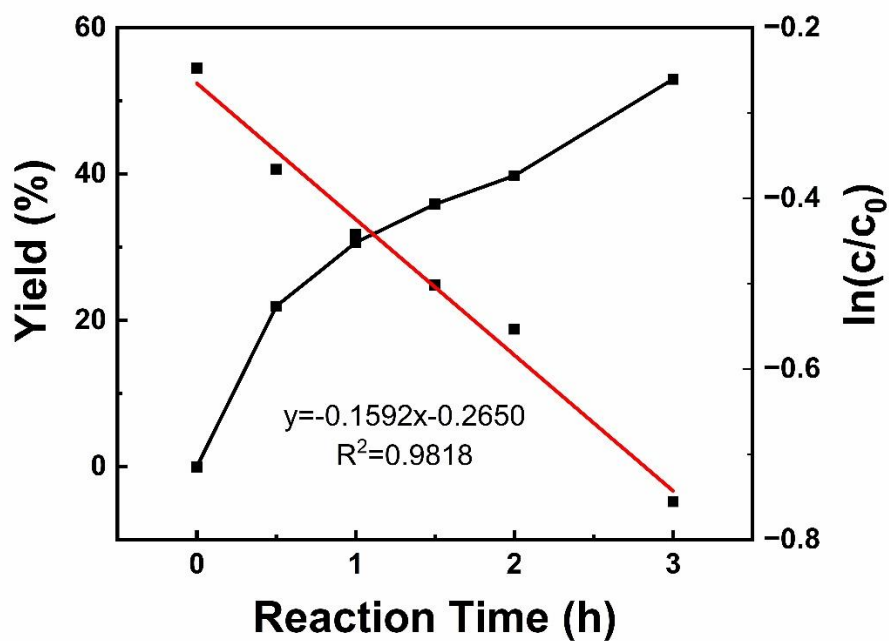

**Fig. S8.** Kinetic study of the oxidative coupling of benzylamine catalyzed by  $\text{Cu}_3$ .

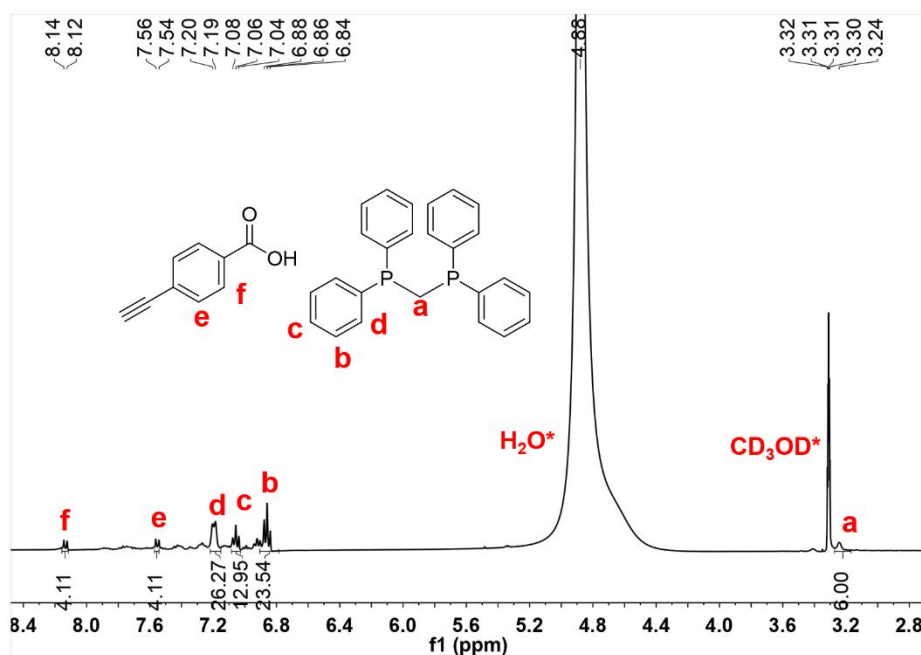

**Fig. S9.**  $^1\text{H}$  NMR spectrum of **Cu<sub>3</sub>** after catalytic reaction. (400 MHz,  $\text{CD}_3\text{OD}$ , 298 K).

**Table S4.** Experiments on the Expansion of Photocatalytic Benzylamine Coupling Substrates

| Entry | Substrate | Product | Conversion(%) |
|-------|-----------|---------|---------------|
| 1     |           |         | 99            |
| 2     |           |         | 99            |
| 3     |           |         | 99            |
| 4     |           |         | 99            |
| 5     |           |         | 99            |
| 6     |           |         | 88            |

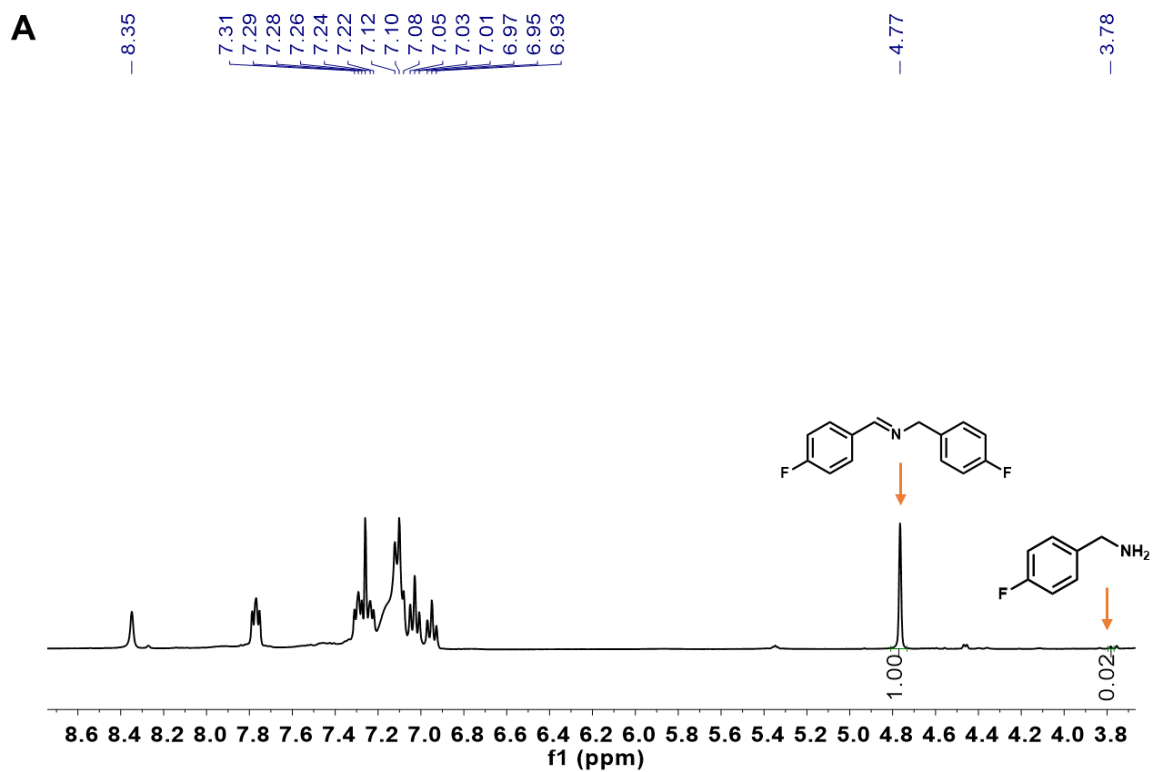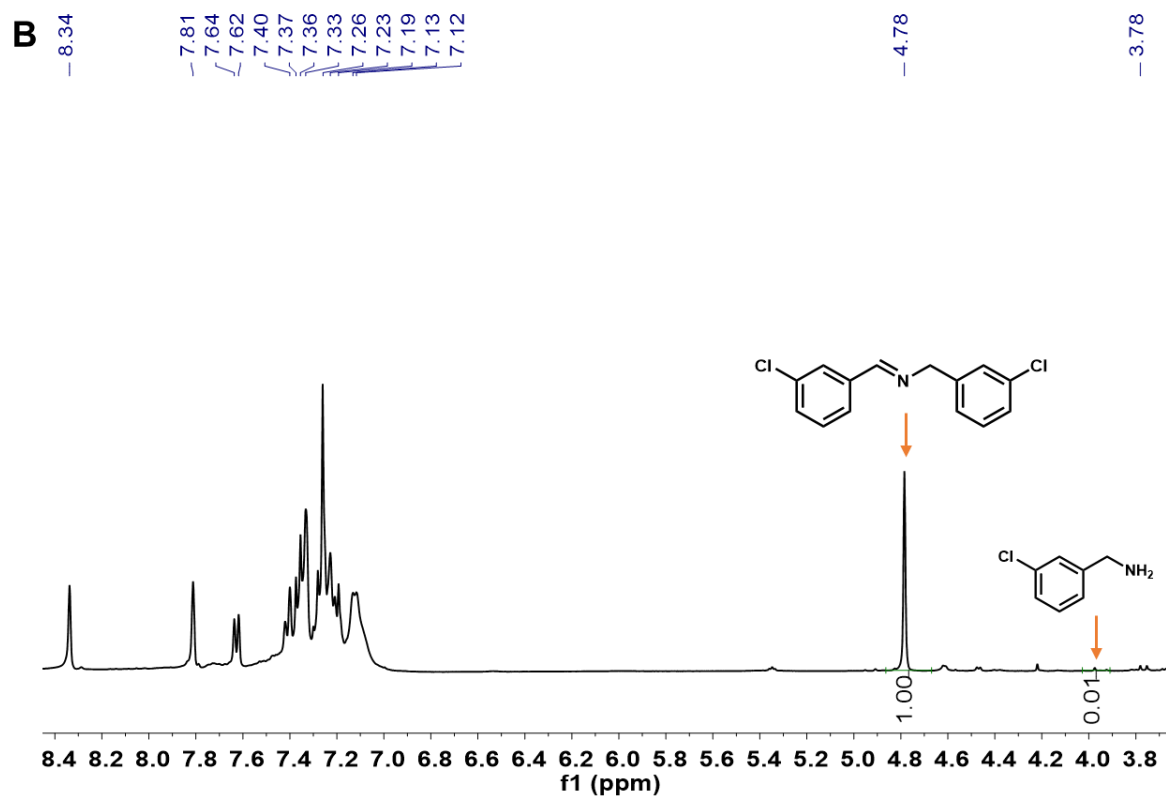

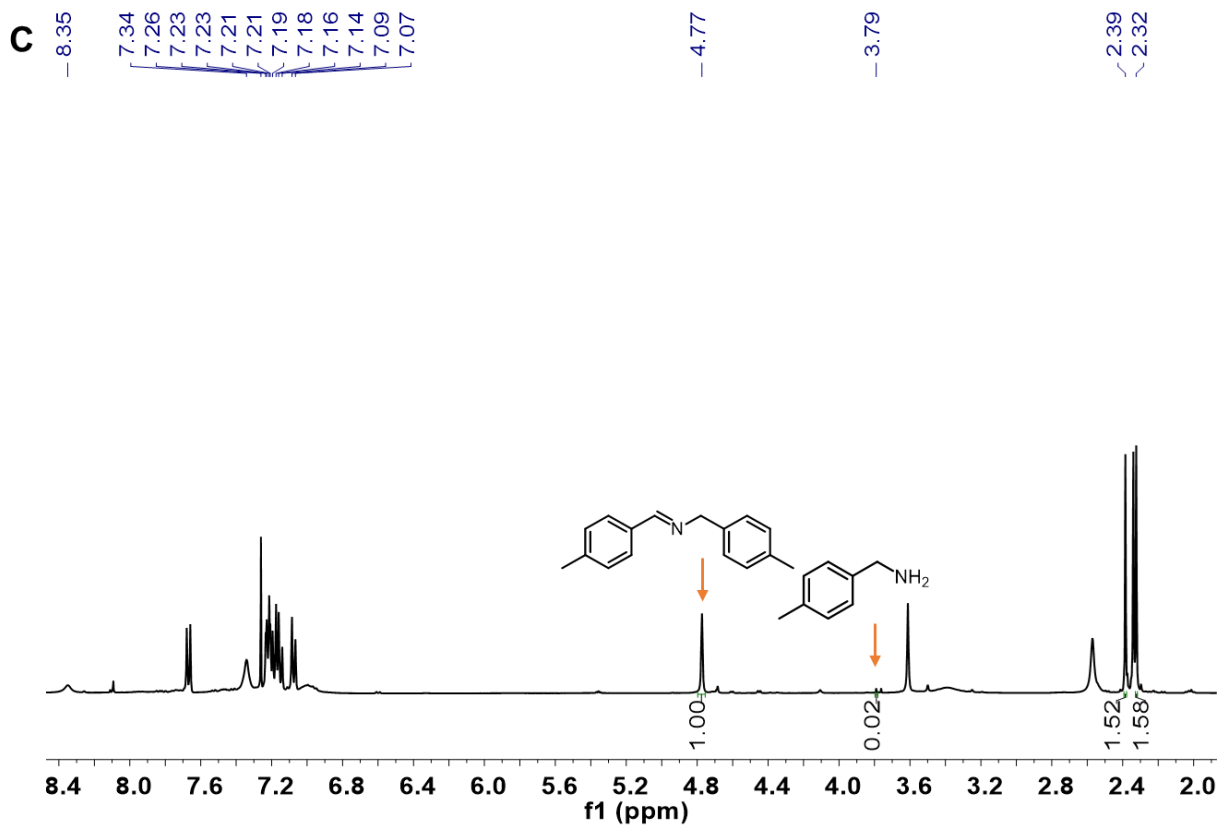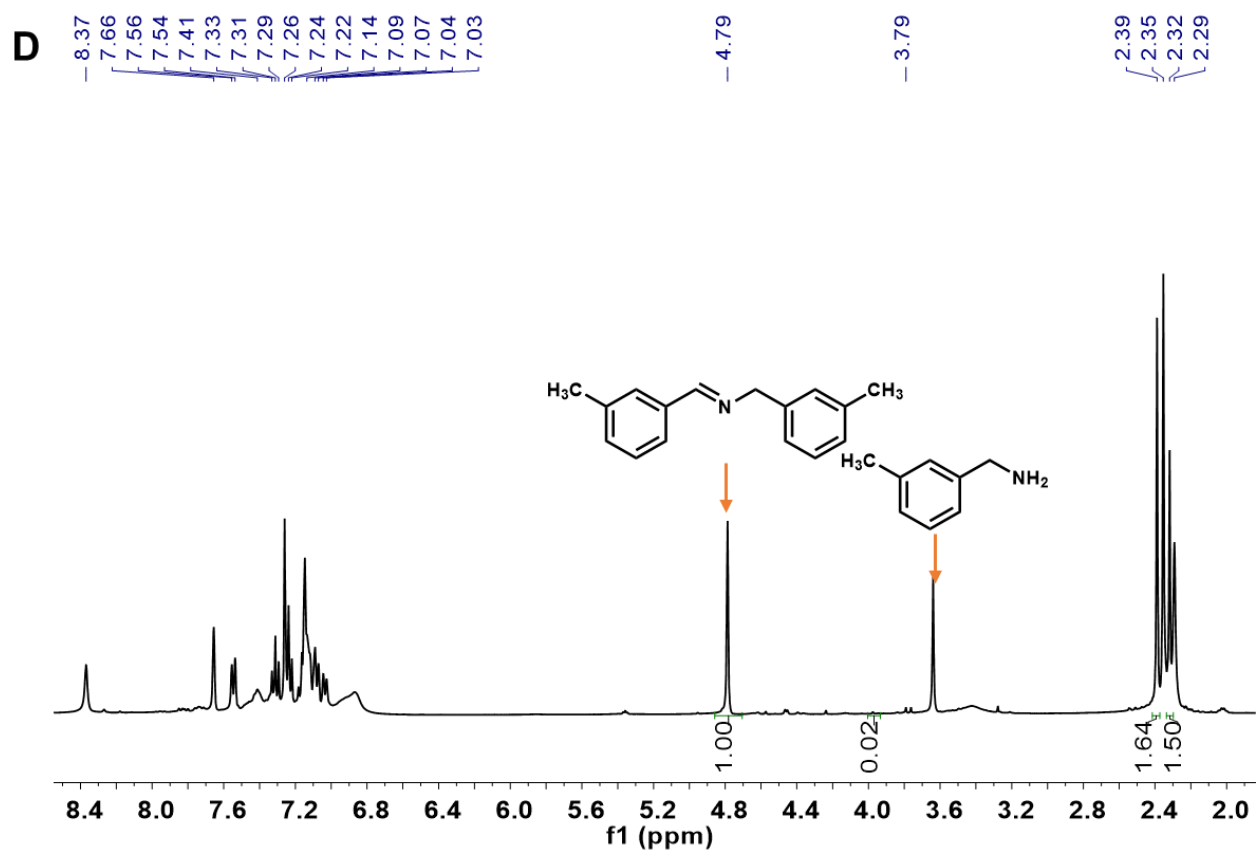

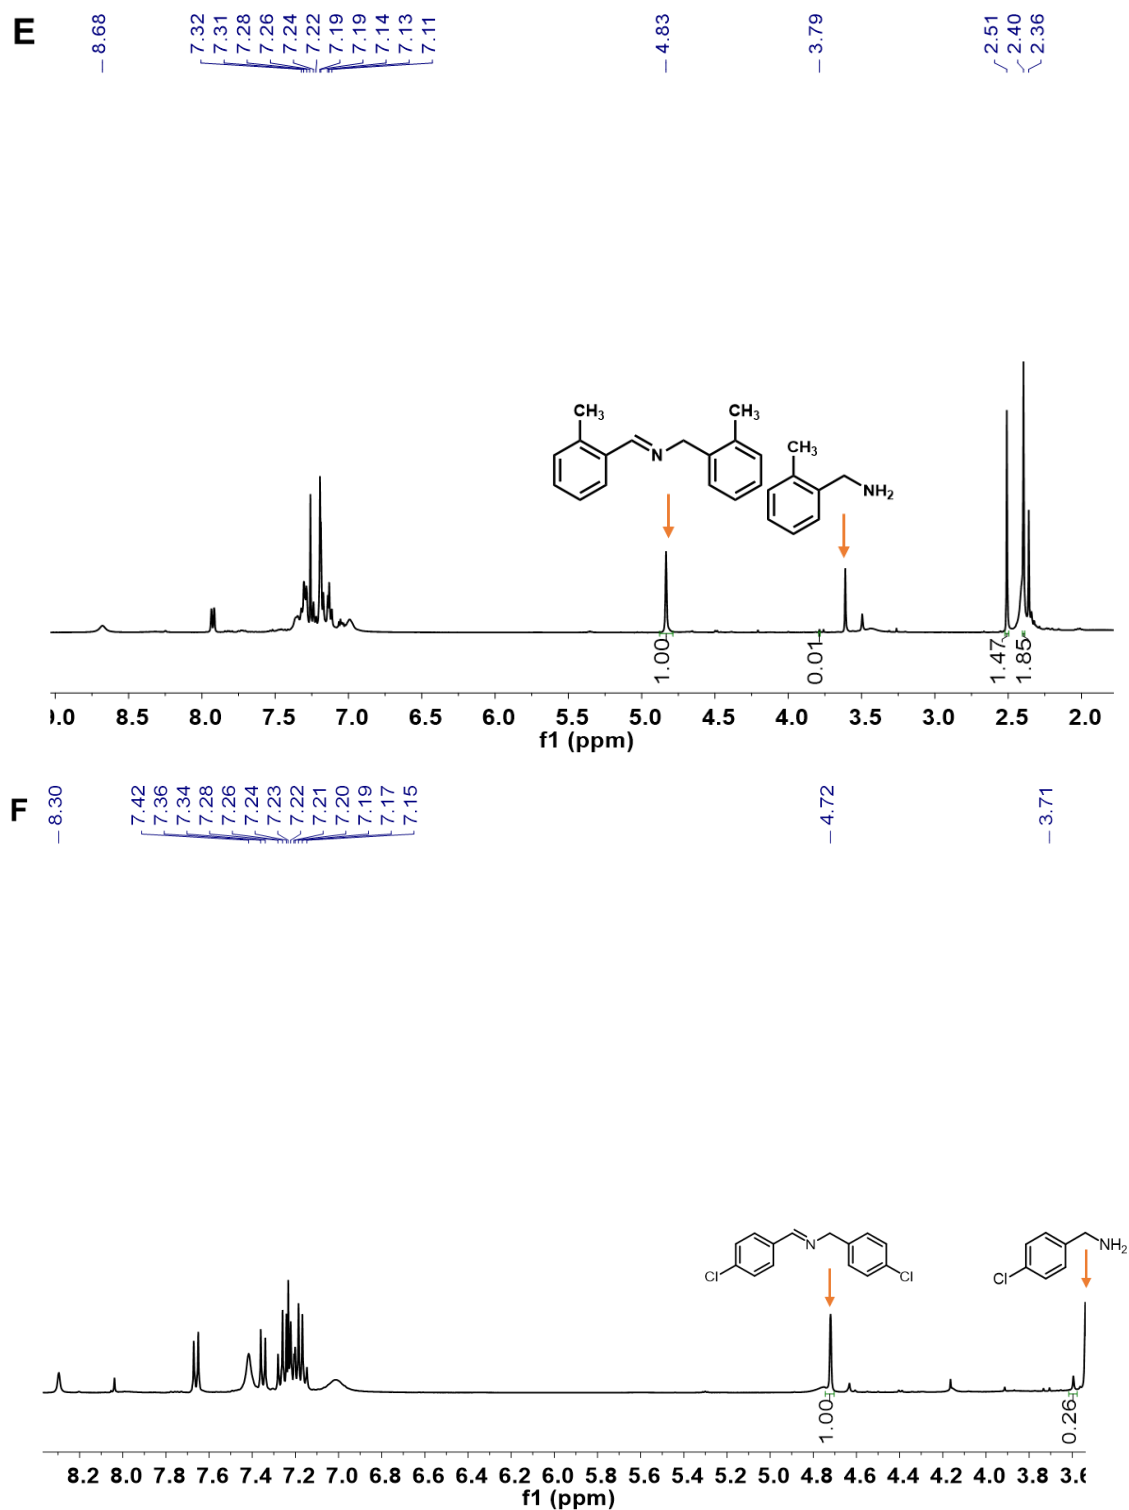

**Fig. S10.** <sup>1</sup>H NMR signals of phenethylamine derivatives. (A): Table S4, entry 1; (B): Table S4, entry 2; (C): Table S4, entry 3; (D): Table S4, entry 4; (E): Table S4, entry 5; (F): Table S4, entry 6.
